# Supplementary material
Source: Springer Nature journal article supplement (https://www.springermedizin.de/resource/supplementary/12974_2013_980_MOESM2_ESM.pdf/9600566)
Supplement: MOESM2 [file 9600566]

**Additional file 2: Table S2. Analysis of differentially expressed entities identified using Partek**

| <b>Genbank</b>                         | <b>Gene</b>   | <b>Gene Name</b>                         | <b>Fold</b>   | <b>P-value</b> |
|----------------------------------------|---------------|------------------------------------------|---------------|----------------|
| <b>Accession</b>                       | <b>Symbol</b> |                                          | <b>Change</b> |                |
| <b>Fold Change <math>\geq 2</math></b> |               |                                          |               |                |
| NM_008491                              | Lcn2          | Lipocalin 2                              | 29.29         | 2.61E-05       |
| NM_011315                              | Saa3          | Serum amyloid A3                         | 11.60         | 2.56E-04       |
| NM_016850                              | Irf7          | Interferon regulatory factor 7           | 6.08          | 1.1E-04        |
| NM_011854                              | Oasl2         | 2'-5' Oligoadenylate synthetase-like 2   | 5.44          | 1.01E-04       |
| BC150711                               | AI607873      | Interferon activated gene 204 homologue  | 4.93          | 3.74E-05       |
| NM_023386                              | Rtp4          | Receptor transporter protein 4           | 4.75          | 1.21E-04       |
| NM_025378                              | Ifitm3        | Interferon induced transmembrane protein | 4.22          | 1.30E-05       |
| NM_011579                              | Tgtp1         | T-cell specific GTPase 1                 | 3.79          | 3.64E-04       |
| NM_008620                              | Gbp4          | Guanylate binding protein 4              | 3.76          | 1.39E-04       |
| NM_013563                              | Il2rg         | Interleukin 2 receptor, gamma chain      | 3.71          | 9.29E-05       |
| NM_023065                              | Ifi30         | Interferon gamma inducible protein 30    | 3.64          | 9.95E-05       |
| NM_144559                              | Fcgr4         | Fc receptor, IgG, low affinity IV        | 3.57          | 4.23E-06       |
| NM_194336                              | Gbp6          | Guanylate binding protein 6              | 3.54          | 5.68E-06       |

|              |           |                                                             |      |          |
|--------------|-----------|-------------------------------------------------------------|------|----------|
| NM_009252    | Serpina3n | Serine (or cysteine) peptidase inhibitor, clade A           | 3.52 | 3.12E-04 |
| NM_001082960 | Itgam     | Integrin alpha M                                            | 3.41 | 2.45E-04 |
| NM_001033767 | Gm4951    | Predicted gene 4951                                         | 3.36 | 4.14E-05 |
| ---          | N/A*      | ---                                                         | 3.35 | 2.71E-05 |
| NM_011150    | Lgals3bp  | Lectin, galactoside-binding, soluble, 3 binding protein     | 3.31 | 7.93E-05 |
| NM_001001892 | H2-K1     | Histocompatibility 2, K1, K region                          | 3.24 | 3.11E-04 |
| NM_008331    | Ifit1     | Interferon-induced protein with tetratricopeptide repeats   | 3.23 | 3.50E-05 |
| NM_009780    | C4b       | Complement component 4B (Chido blood group)                 | 3.13 | 2.78E-04 |
| NM_011905    | Tlr2      | Toll-like receptor 2                                        | 3.09 | 1.74E-05 |
| ---          | Rnf213**  | Ring finger protein 213                                     | 3.09 | 1.22E-04 |
| AK173199     | Rnf213    | Ring finger protein 213                                     | 3.07 | 5.21E-06 |
| NM_010260    | Gbp2      | Guanylate binding protein 2                                 | 3.02 | 8.62E-05 |
| NM_013673    | Sp100     | Nuclear antigen Sp100                                       | 3.02 | 1.8E-04  |
| NM_145545    | Gbp7      | Guanylate binding protein 7                                 | 2.86 | 3.04E-05 |
| ---          | Rnf213**  | Ring finger protein 213                                     | 2.74 | 1.15E-04 |
| NM_010130    | Emr1      | EGF-like module containing, mucin-like, hormone receptor-li | 2.72 | 1.74E-04 |
| ---          | Rnf213    | Ring finger protein 213                                     | 2.69 | 1E-04    |
| ---          | N/A*      | ---                                                         | 2.69 | 2E-04    |

|              |          |                                                       |      |          |
|--------------|----------|-------------------------------------------------------|------|----------|
| NM_011693    | Vcam1    | Vascular cell adhesion molecule 1                     | 2.68 | 1.11E-04 |
| NM_018734    | Gbp3     | Guanylate binding protein 3                           | 2.66 | 6.62E-05 |
| NM_009402    | Pglyrp1  | Peptidoglycan recognition protein<br>1                | 2.56 | 1.89E-05 |
| NM_010738    | Ly6a     | Lymphocyte antigen 6 complex,<br>locus A              | 2.55 | 3.80E-05 |
| NM_009283    | Stat1    | Signal transducer and activator of<br>transcription 1 | 2.51 | 2.41E-04 |
| NM_009982    | Ctsc     | Cathepsin C                                           | 2.47 | 3.09E-06 |
| NM_153197    | Clec4a3  | C-type lectin domain family 4,<br>member a3           | 2.46 | 2.91E-04 |
| AK173199     | Rnf213   | Ring finger protein 213                               | 2.39 | 2.53E-04 |
| NM_008879    | Lcp1     | Lymphocyte cytosolic protein 1                        | 2.36 | 1.27E-04 |
| NM_008326    | Irgm     | immunity-related GTPase family<br>M member 1          | 2.33 | 3.25E-04 |
| ---          | N/A*     | ---                                                   | 2.32 | 1.42E-04 |
| NM_001160415 | Apobec3  | apolipoprotein B mRNA editing<br>enzyme               | 2.32 | 1.86E-04 |
| NM_031195    | Msr1     | Macrophage scavenger receptor 1                       | 2.29 | 4.58E-05 |
| ---          | Rnf213** | Ring finger protein 213                               | 2.26 | 1.29E-05 |
| NM_011708    | Vwf      | Von Willebrand factor homolog                         | 2.26 | 3.89E-05 |
| NM_031376    | Pik3ap1  | phosphoinositide-3-kinase adaptor<br>protein 1        | 2.21 | 1.41E-04 |
| NM_021384    | Rsad2    | Radical S-adenosyl methionine<br>domain containing 2  | 2.18 | 2.37E-04 |

|              |        |                                                   |      |          |
|--------------|--------|---------------------------------------------------|------|----------|
| ---          | N/A*   | ---                                               | 2.13 | 1.4E-04  |
| NM_001163522 | Emcn   | Endomucin                                         | 2.12 | 1.34E-04 |
| NM_001037713 | Xaf1   | XIAP associated factor 1                          | 2.09 | 1.74E-04 |
| NM_001113356 | C1rb   | Complement component 1, r<br>subcomponent B       | 2.09 | 1.99E-04 |
| NM_013690    | Tek    | Endothelial-specific receptor<br>tyrosine kinase  | 2.06 | 1.37E-04 |
| NM_012054    | Aoah   | Acyloxyacyl hydrolase                             | 2.04 | 3.06E-04 |
| NM_001039530 | Parp14 | Poly (ADP-ribose) polymerase<br>family, member 14 | 2.02 | 7.28E-05 |

**Fold Change  $\geq$  1.5**

|              |          |                                              |         |          |
|--------------|----------|----------------------------------------------|---------|----------|
| NM_013805    | Cldn5    | claudin 5                                    | 1.97597 | 8.43E-05 |
| ---          | Rnf213** | Ring finger protein 213                      | 1.91996 | 1.46E-04 |
| NM_172479    | Slc38a5  | Solute carrier family 38, member 5           | 1.86936 | 8.83E-05 |
| NM_001081215 | Ddx60    | DEAD (Asp-Glu-Ala-Asp) box<br>polypeptide 60 | 1.8692  | 1.33E-05 |
| NM_010833    | Msn      | Moesin                                       | 1.85669 | 1.59E-04 |
| NM_010741    | Ly6c1    | lymphocyte antigen 6 complex,<br>locus C1    | 1.84075 | 1.33E-04 |
| NR_030719    | Gm8979   | very large inducible GTPase 1<br>pseudogene  | 1.83413 | 8.11E-05 |
| BC023105     | BC023105 | cDNA sequence BC023105                       | 1.81633 | 5.22E-05 |
| NM_025992    | Herc5    | hect domain and RLD 5                        | 1.80396 | 2.4E-04  |
| NM_009868    | Cdh5     | cadherin 5                                   | 1.80082 | 1.62E-05 |

|              |          |                                                       |         |          |
|--------------|----------|-------------------------------------------------------|---------|----------|
| NM_010493    | Icam1    | intercellular adhesion molecule 1                     | 1.79505 | 1.36E-04 |
| ---          | N/A*     | ---                                                   | 1.76818 | 1.63E-04 |
| ---          | Rnf213** | Ring finger protein 213                               | 1.763   | 3E-04    |
| NR_003507    | Oas1b    | 2'-5' oligoadenylate synthetase 1B                    | 1.75542 | 1.55E-04 |
| NM_010104    | Edn1     | endothelin 1                                          | 1.74503 | 1.66E-04 |
| NM_028261    | Tmem173  | transmembrane protein 173                             | 1.73832 | 2.27E-05 |
| NM_010225    | Foxf2    | forkhead box F2                                       | 1.71563 | 7.39E-05 |
| NM_007609    | Casp4    | caspase 4, apoptosis-related<br>cysteine peptidase    | 1.70807 | 1.29E-04 |
| NM_031181    | Siglece  | sialic acid binding Ig-like lectin E                  | 1.69006 | 1.7E-04  |
| NM_009888    | Cfh      | complement component factor h                         | 1.64032 | 2.28E-04 |
| NM_001037298 | Fam38a   | family with sequence similarity<br>38, member A       | 1.62396 | 9.95E-05 |
| NM_019963    | Stat2    | signal transducer and activator of<br>transcription 2 | 1.60841 | 1.01E-04 |
| NM_030253    | Parp9    | poly (ADP-ribose) polymerase<br>family, member 9      | 1.59804 | 1.17E-04 |
| NM_001111059 | Cd34     | CD34 antigen                                          | 1.59774 | 8.42E-05 |
| ---          | N/A*     | ---                                                   | 1.58439 | 1.27E-04 |
| NM_025659    | Abi3     | ABI gene family, member 3                             | 1.54831 | 1.42E-04 |
| ---          | N/A*     | ---                                                   | 1.52005 | 3.61E-04 |
| NM_028195    | Cyth4    | cytohesin 4                                           | 1.5195  | 1.00E-04 |
| NM_183168    | P2ry6    | pyrimidinergic receptor P2Y, G-<br>protein coupled, 6 | 1.51848 | 3.49E-04 |
| NM_007705    | Cirbp    | cold inducible RNA binding                            | -1.5643 | 3.09E-04 |

---

protein

---

Significance was calculated using one-way ANOVA and a Benjamini-Hochberg multiple testing correction.

\*Probe sets don't map to annotated genes

\*\*Annotations manually determined using Affymetrix online database, NetAffx
